# Supplementary material for: Strongly electrophilic heteroatoms confined in atomic CoOOH nanosheets realizing efficient electrocatalytic water oxidation
Source: Royal Society of Chemistry journal article supplement (doi:10.1039/c7ta09412d), 2018-01-01
Supplement: c7ta09412d1.pdf [file c7ta09412d1.pdf]

## Supporting Information

### **Strong-electrophilic heteroatom confined in atomic CoOOH nanosheets realizing efficient electrocatalytic water oxidation**

Yuanyuan Huang<sup>†</sup>, Xu Zhao<sup>†</sup>, Fumin Tang, Xusheng Zheng, Weiren Cheng,<sup>\*</sup> Wei Che, Fengchun Hu, Yong Jiang, Qinghua Liu,<sup>\*</sup> and Shiqiang Wei

*National Synchrotron Radiation Laboratory, University of Science and Technology of China, Hefei 230029, Anhui, P. R. China*

<sup>†</sup>These authors contributed equally to this work.

<sup>\*</sup>E-mail: weiren@ustc.edu.cn; qhliu@ustc.edu.cn

#### **Synthesis of Mn-confined CoOOH nanosheets.**

The Mn-confined CoOOH nanosheets were synthesized by a two-step method. First, 0.8 mmol CoCl<sub>2</sub>·6H<sub>2</sub>O were dissolved into 40 ml ethylene glycol and deionized water mixture. Followed by being bubbled by N<sub>2</sub> for 1 h, the solution was adjusted to be alkaline by adding 5 M ammonia. The solution was then mixed with prepared Manganese chloride solutions. The mixed solution were then transferred to a Teflon-lined stainless autoclave and heated at 130 °C for 20 h. The obtained precursor Co(OH)<sub>2</sub> were collected by centrifugation, washed with ethanol, then ultrasonic dispersed in deionized water again, and then 0.5 M NaClO solution was dropped in at 50 °C under vigorous stirring for oxidation treatment. Finally, the precipitate was washed with water and then was ultrasonic treated to exfoliate the products into nanosheets. For comparison purpose, the pure CoOOH nanosheets were also prepared without Manganese chloride solutions. The IrO<sub>2</sub> and MnO<sub>2</sub> was commercial product obtained from Alfa Aesar.

**Morphology and structure characterizations.** TEM, HRTEM and EDS were performed by using a JEOL-2010 TEM with an acceleration voltage of 200 kV. XPS were acquired on Thermo ESCALAB 250 with Al K $\alpha$  ( $h\nu = 1486.6$  eV) as the excitation source. The XAFS data were collected at BL14W1 station in Shanghai Synchrotron Radiation Facility and 1W1B station in Beijing Synchrotron Radiation

Facility. The O *k*-edge was measured at BL12B-a beamline of National Synchrotron Radiation Laboratory in the total electron yield mode under a vacuum better than  $5 \times 10^{-6}$  Pa. The beam from the bending magnet was monochromatized utilizing a varied line-spacing plane grating and refocused by a toroidal mirror.

**Electrochemical characterization.** Electrochemical measurements were performed using an electrochemical workstation (Model CHI760D, CH instruments, Inc., Austin, TX) with a three-electrode system, operated with the modified glassy carbon disk electrode as working electrode, platinum mesh as the counter electrode, and saturated Ag/AgCl as reference electrode in 1M KOH electrolyte. The Linear Sweep Voltammetry (LSV) curves were measured at a rate of 1 mV/s without IR correction after dozens of cyclic voltammetric scans until stable. Electrochemical impedance spectroscopy (EIS) was recorded with frequency range of 0.1–1000 kHz at a bias potential of 1.6 V vs RHE. To avoid Faradaic region, the electrochemical double layer capacitance ( $C_{dl}$ ) was measured at a range of 1.0–1.1 V vs RHE at rate ranging from 10 to 100 mV/s with interval 10 mV increment.

For electrode preparation, 2mg of fresh prepared Mn-confined CoOOH nanosheets, was dispersed in 1ml of 3:1 (v/v) DI-water/ethanol mixture solvent under ultrasonic water bath for about 30min. After that, an amount of carbon black and 20 $\mu$ l Nafion solution (5 wt%, Sigma-Aldrich) was added, and the mingled solution was sonicated in an ultrasonic water bath for another 30min. Subsequently, 5  $\mu$ l of the dispersion was transferred onto the glassy carbon disk with a diameter of 3mm, corresponding to the catalyst loading about 0.15 mg/cm<sup>2</sup>.

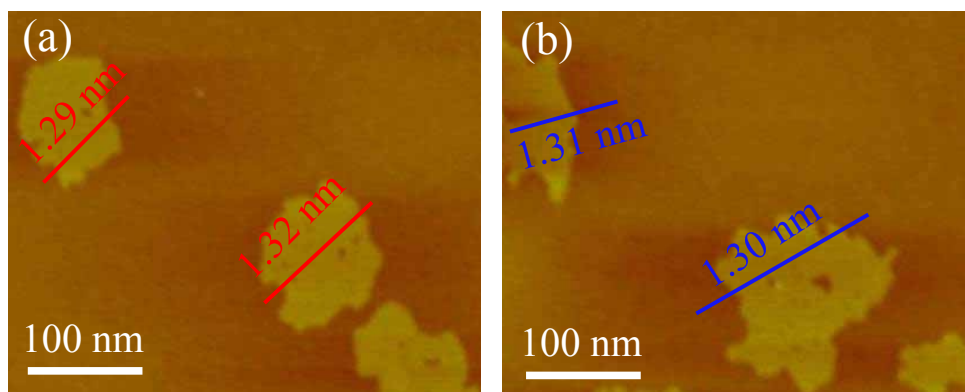

**Figure S1.** AFM images for (a) 2% and (b) 5% Mn-CoOOH nanosheets.

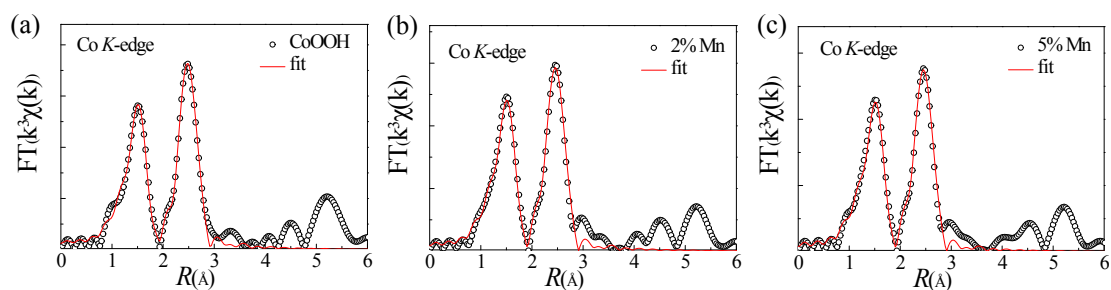

**Figure S2.** Co *K*-edge EXAFS fitting results for (a) pure CoOOH, (b) 2% Mn-CoOOH and (c) 5% Mn-CoOOH.

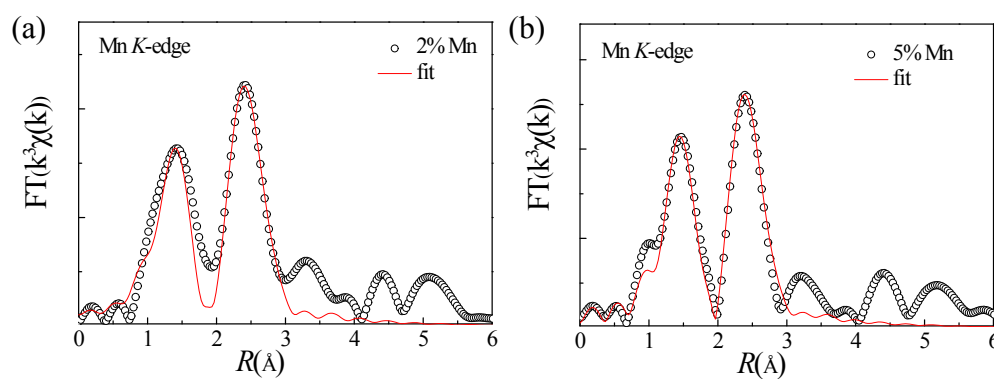

**Figure S3.** Mn *K*-edge EXAFS fitting results for (a) 2% Mn-CoOOH and (b) 5% Mn-CoOOH.

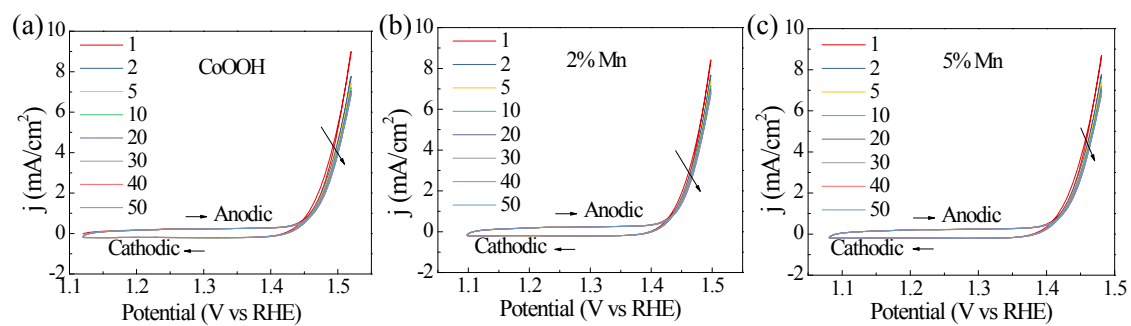

**Figure S4.** CVs before OER measurements for (a) 2%Mn-CoOOH and (b) 5%Mn-CoOOH.

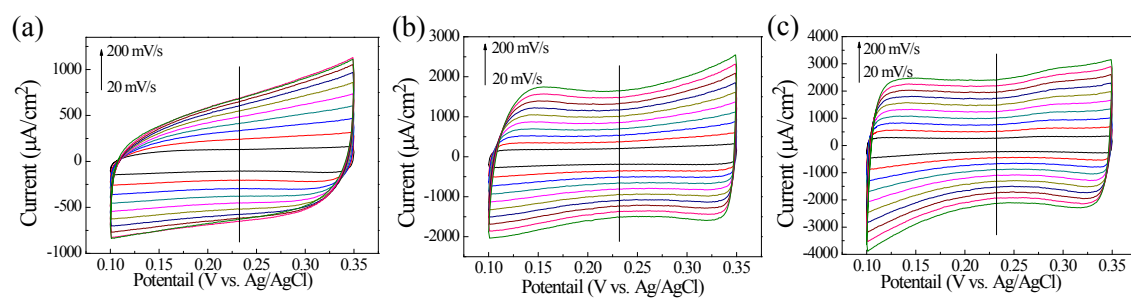

**Figure S5.** CVs towards double-layer capacitance calculations for (a) CoOOH, (b) 2%Mn-CoOOH, and (c) 5%Mn-CoOOH.

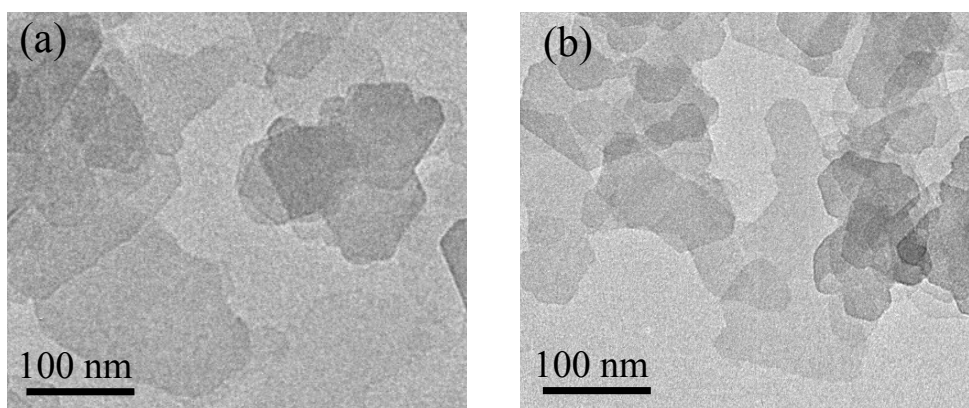

**Figure S6.** TEM images of (a) 2% and (b) 5% Mn- CoOOH after OER measurements.

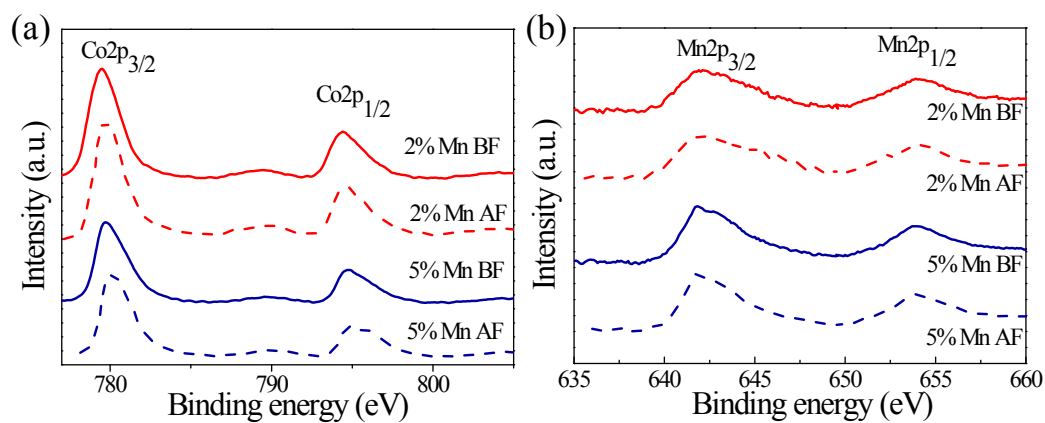

**Figure S7.** (a) Co  $2p$  and (b) Mn  $2p$  XPS spectra for Mn-CoOOH before (BF) and after (AF) OER tests.

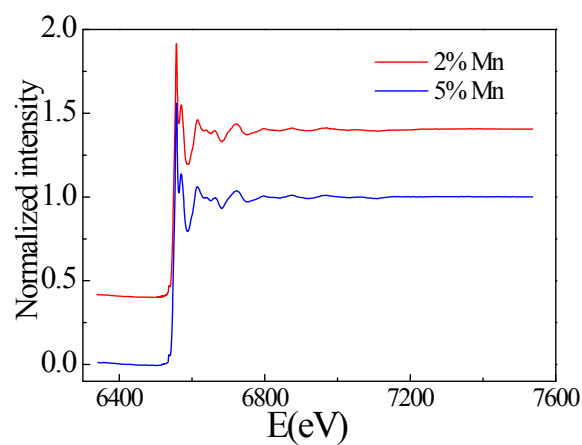

**Figure S8.** Mn K-edge EXFAS spectra of 2% and 5% Mn-doped CoOOH nanosheets.

**Table S1.** Summary of OER performance of cobalt-based electrocatalysts.

| Catalysts                         | Over-potential @10mA/cm <sup>2</sup> (mV) | Tafel slope (mV/dec) | Electrolyte | Substrate       | Reference |
|-----------------------------------|-------------------------------------------|----------------------|-------------|-----------------|-----------|
| Mn-CoOOH nanosheets               | 255                                       | 38                   | 1M NaOH     | Glassy carbon   | This work |
| CoOOH nanosheets                  | 300                                       | 38                   | 1M KOH      | Glassy carbon   | [1]       |
| Ni-CoOOH nanowires                | 285                                       | 36                   | 0.1M KOH    | Stainless steel | [2]       |
| Mn-CoOOH nanowires                | 315                                       | 52                   | 0.1M KOH    | Stainless steel | [2]       |
| CoO <sub>x</sub> /B,N-graphene    | 295                                       | 57                   | 0.1M KOH    | Glassy carbon   | [3]       |
| NiCo <sub>2</sub> S <sub>4</sub>  | 210                                       | 40                   | 1M KOH      | 3D Ni foam      | [4]       |
| Co <sub>3</sub> O <sub>4</sub>    | 300                                       | 68                   | 0.1M KOH    | Ti foil         | [5]       |
| CoNi(OH) <sub>x</sub>             | 280                                       | 77                   | 1M KOH      | Cu foil         | [6]       |
| Co <sub>3</sub> O <sub>4</sub> /C | 290                                       | 70                   | 0.1M KOH    | Cu foil         | [7]       |

## References

- (1) Huang, J. H., Chen, J. T., Yao, T., He, J. F., Jiang, S., Sun, Z. H., Liu, Q. H., Cheng, W. R., Hu, F. C., Jiang, Y., Pan, Z. Y., Wei, S. Q., CoOOH Nanosheets with High Mass Activity for Water Oxidation, *Angew. Chem. Int. Ed.* **2015**, *54*, 8722-8727.
- (2) Chen, Z., Kronawitter, C. X., Yeh, Y. W., Yang, X. F., Zhao, P., Yao, N., Koel, B. E., *J. Mater. Chem. A* **2017**, *5*, 842.
- (3) Tong Y., Chen P. Z., Zhou T. P., Xu K., Chu W. S., Wu C. Z., Xie Y., A Bifunctional Hybrid Electrocatalyst for Oxygen Reduction and Evolution: Cobalt Oxide Nanoparticles Strongly Coupled to B,N-Decorated Graphene. *Angew. Chem. Int. Ed.* **2017**, *56*, 7121-7125.
- (4) Sivanantham A., Ganesan P., Shanmugam S., Hierarchical NiCo<sub>2</sub>S<sub>4</sub> Nanowire Arrays Supported on Ni Foam: An Efficient and Durable Bifunctional Electrocatalyst for Oxygen and Hydrogen Evolution Reactions. *Adv. Funct. Mater.* **2016**, *26*, 4661.
- (5) Xu L., Jiang Q. Q., Xiao Z. H., Li X. Y., Huo J., Wang S. Y., Dai L. M., Plasma-Engraved Co<sub>3</sub>O<sub>4</sub> Nanosheets with Oxygen Vacancies and High Surface Area for the Oxygen Evolution Reaction. *Angew. Chem. Int. Ed.* **2016**, *55*, 5277-5281.
- (6) Li S. W., Wang Y. C., Peng S. J., Zhang L. J., M. Al-Enizi A., Zhang H., Sun X. H., Zheng G. F., Electrocatalysts: Co–Ni-Based Nanotubes/Nanosheets as Efficient Water Splitting Electrocatalysts. *Adv. Energy Mater.* **2016**, *6*, 1501661.
- (7) Ma T. Y., Dai S., Jaroniec M., Qiao S. Z., Metal–Organic Framework Derived Hybrid Co<sub>3</sub>O<sub>4</sub>-Carbon Porous Nanowire Arrays as Reversible Oxygen Evolution Electrodes. *J. Am. Chem. Soc.* **2014**, *136*, 13925-13931.
